1 **Simultaneous aerosol and intra-muscular immunization with influenza vaccine induces**  
2 **powerful protective local T cell and systemic Ab immune responses in pigs**  
3

4 Veronica Martini<sup>1,6,\*</sup>, Basu Paudyal<sup>1</sup>, Tiphany Chrun<sup>1</sup>, Adam McNee<sup>1</sup>, Matthew Edmans<sup>1</sup>,  
5 Emmanuel Maze<sup>1</sup>, Beckie Clark<sup>1</sup>, Alejandro Nunez<sup>2</sup>, Garry Dolton<sup>3</sup>, Andrew Sewell<sup>3</sup>, Peter  
6 Beverley<sup>4</sup>, Ronan MacLoughlin<sup>5</sup>, Alain Townsend<sup>6</sup> and Elma Tchilian<sup>1,\*</sup>  
7

8 <sup>1</sup> The Pirbright Institute, Pirbright GU24 0NF, UK

9 <sup>2</sup> Animal and Plant Health Agency-Weybridge, New Haw, Addlestone KT15 3NB, UK

10 <sup>3</sup> Division of Infection and Immunity, Cardiff University School of Medicine, Cardiff, Wales,  
11 UK

12 <sup>4</sup> National Heart and Lung Institute, St Mary's Campus, Imperial College, London W2 1PG,  
13 UK

14 <sup>5</sup> Aerogen Ltd, IDA Business Park, Dangan, Galway, Ireland

15 <sup>6</sup> Weatherall Institute of Molecular Medicine, University of Oxford, Oxford OX3 9DS, UK  
16

17  
18 \*Corresponding authors: Veronica Martini [veronica.martini@pirbright.ac.uk](mailto:veronica.martini@pirbright.ac.uk) and Elma  
19 Tchilian [elma.tchilian@pirbright.ac.uk](mailto:elma.tchilian@pirbright.ac.uk)

20 **Abstract**

21 A vaccine providing both powerful antibody and cross-reactive T cell immune responses  
22 against influenza viruses would be beneficial for both humans and pigs. Here we evaluated  
23 intramuscular (IM), aerosol (Aer) and simultaneous immunization (SIM) by both routes in  
24 pigs, using the single cycle candidate influenza vaccine S-FLU. After prime and boost  
25 immunization pigs were challenged with H1N1pdm09 virus. IM immunized pigs generated  
26 high titer of neutralizing antibodies but poor T cell responses, while Aer induced powerful  
27 respiratory tract T cell responses, but a low titer of antibodies. SIM pigs combined high  
28 antibody titers and strong local T cell responses. SIM pigs showed the most complete  
29 suppression of virus shedding and the greatest improvement in pathology. We conclude that  
30 SIM regimes for immunization against respiratory pathogens warrant further study.

## 31 **Introduction**

32 Immunization against infectious diseases has been practised for several centuries but  
33 identifying the best method of administering a vaccine is still often a matter of empirical  
34 experimentation. Three major considerations should make rational immunization easier. The  
35 first is the importance of pathogen associated molecular patterns, which are essential for  
36 triggering an immune response. The second that the site of immunization programmes  
37 lymphocytes to return to it. The third that local immune responses are critical for protection  
38 against mucosal infection and that many lymphocytes reside in non-lymphoid tissues and  
39 provide tissue resident memory. Immunization at the site of infection offers the advantage  
40 that an immune response is generated at the site of entry of the pathogen and should provide  
41 immediate protection.

42 Immunization of the respiratory tract has been demonstrated to be highly effective  
43 against influenza and cold adapted live attenuated influenza vaccine (LAIV) has efficacy  
44 rates of 75-80% in children and additionally gives some cross-reactive protection against  
45 antigenically distinct strains. However, LAIV is not so effective in adults or the elderly. In  
46 contrast, the traditional intra-muscular inactivated seasonal human influenza vaccine provides  
47 10-60% efficacy and induces strain-specific immunity by generation of subtype specific  
48 antibody, so that repeated annual vaccination to match new influenza variants is required<sup>1-3</sup>.  
49 Therefore, there is an urgent need for new immunization strategies for influenza that provide  
50 broad and long-lasting protection.

51 One such strategy, which has been explored against tuberculosis (Tb), is to combine  
52 the advantages of local and systemic immunization. Parenteral BCG priming followed by  
53 intranasal boosting with an Adenovirus vectored vaccine expressing antigen 85A (Ad85A)  
54 markedly enhanced protection in mice<sup>4</sup>. We have shown that simultaneous systemic and  
55 respiratory immunization (SIM) with BCG in mice or BCG/BCG and BCG/Ad85A in cattle  
56 enhanced protection against Tb challenge<sup>5,6</sup>. Uddback et al have used this strategy with an  
57 Adeno vector expressing influenza nucleoprotein (NP) and shown greatly improved and  
58 durable protection against heterosubtypic influenza challenge in mice<sup>7,8</sup>. These data prompted  
59 us to test SIM in the pig model using the candidate broadly protective signal minus influenza  
60 vaccine S-FLU. S-FLU is a pseudotyped influenza virus, lacking the HA signal sequence and  
61 therefore limited to a single cycle of replication. S-FLU induces a strong cross-reactive T cell  
62 response, but a minimal humoral response to hemagglutinin when administered mucosally<sup>9,10</sup>.  
63 We have shown that aerosol delivery of S-FLU reduces lung viral load when partially  
64 matched to the challenge virus, correlating with a local lung T cell immune response<sup>11</sup>. When

65 S-FLU was completely mismatched to the challenge virus, pathology but not viral load, was  
66 reduced. This suggests that, in the absence of an antibody response, lung T cell immunity can  
67 reduce disease severity<sup>12</sup>. By contrast, the same S-FLU preparation induced sterile immunity  
68 to the matched challenge virus and reduced replication and aerosol transmission to naïve  
69 recipients following mismatched viral challenge in ferrets<sup>12</sup>. The pig is a more relevant large  
70 animal model because it is a natural host for influenza viruses and has very similar  
71 respiratory anatomy to humans<sup>13,14</sup>. Pigs and humans are infected by the same subtypes of  
72 influenza A viruses and are integrally connected in the ecology of influenza.

73 Here we evaluated the efficacy of SIM with S-FLU against H1N1pdm09 challenge  
74 using inbred Babraham pigs, allowing a more refined analysis of the specificity of the  
75 immune responses using MHC class I tetramers to previously defined immunodominant NP  
76 epitopes<sup>15</sup>.

77

## 78 **Results**

79 **Virus load and lung pathology.** To evaluate the efficacy of simultaneous pulmonary and  
80 systemic immunization, groups of 6 inbred Babraham pigs were immunized with S-FLU  
81 expressing NA and coated in the HA from H1N1pdm09 intra-muscularly (IM) or by aerosol  
82 (Aer) alone or simultaneously by aerosol and intra-muscularly (SIM). The SIM group  
83 received the same total dose as the IM or Aer groups, but split between the two sites.  
84 Untreated pigs were used as controls. The animals were boosted 3 weeks later and, after a  
85 further 3 weeks, challenged with H1N1pdm09 virus and culled 4 days after the challenge  
86 (**Fig. 1a**). Two pigs were culled before the end of the experiment because of underlying heart  
87 conditions, unrelated to the study, leaving 5 animals in the IM and control groups. Virus load  
88 was assessed in nasal swabs and broncho-alveolar lavage (BAL). The SIM pigs showed the  
89 greatest reduction of virus shedding in the nasal swabs at all time points except for the third  
90 day post challenge (DPC) (**Fig. 1b**). In the IM group, two individuals shed virus consistently  
91 after challenge but a significant reduction in viral load was achieved on 1 DPC. Aerosol  
92 immunization did not decrease virus shedding although 2 pigs did not shed at 4 DPC (**Fig.**  
93 **1b**). Overall IM and SIM significantly reduced the viral load in the nasal swabs over time,  
94 with an average area under the viral load/time curve (AUC) of 3.46 and 2.23 respectively  
95 compared to 9.53 and 11.46 of the Aer and control group (**Fig. 1c**). No virus was detected in  
96 BAL at 4 DPC in any of the immunized groups (**Fig. 1d**).

97 The unimmunized animals showed typical gross pathology changes in the lungs with  
98 multifocal areas of consolidation in the cranial and medial lobes (**Fig. 2**). A significant

99 reduction in the extension and severity of the gross changes was observed in the IM and SIM  
100 groups ( $p=0.02$  and  $p=0.005$  respectively compared to controls), with a trend towards  
101 improved pathology in the aerosol group that did not reach statistical significance (**Fig. 2b**).  
102 A characteristic bronchiointerstitial pneumonia, with bronchiolitis, alveolar exudation and  
103 lymphohistiocytic infiltration in the alveolar septa and peribronchial and perivascular areas,  
104 was present in the unimmunized animals. A reduction in the severity of these changes was  
105 observed in the immunized groups (**Fig. 2a**). Labelling of influenza A nucleoprotein (NP) by  
106 immunohistochemistry (NP-IHC) was seen in only one animal in the IM and two animals in  
107 the SIM groups ( $p=0.02$  and  $p=0.03$  respectively), whereas most non-immunized pigs  
108 displayed abundant labelling. NP-IHC was reduced in the Aer group although this was not  
109 significant ( $p=0.55$ ). Despite a reduction in gross lesions score and number of virus infected  
110 cells, no significant difference was found when histopathology and NP-IHC were combined  
111 in all immunized groups (Iowa score) (**Fig. 2b**).

112 These results indicate that IM and SIM immunization significantly reduced nasal  
113 virus shedding and pathology, with SIM being more effective in virus clearance and gross  
114 lung pathology reduction. Aerosol immunization did not significantly reduce nasal virus load  
115 or pathology. All immunizations regimes eliminated virus in the BAL.

116

117 **Antibody and B cell responses.** The serum neutralizing titer against H1N1pdm09 in the IM  
118 and SIM groups increased after the boost to a peak at of 4,096 (50% inhibition titre) and  
119 1,812 respectively at 14 days post boost (DPB) and declined by 22 DPB and after the  
120 challenge (**Fig. 3a**). The Aer group had a much lower peak serum neutralizing titer of 54 at  
121 14 DPB (**Fig. 3a**). Neuraminidase (NA) inhibition activity was assessed by enzyme-linked  
122 lectin assay (ELLA) at 4 DPC in the serum. IM immunized animals showed the highest  
123 inhibition titer (1,408) followed by SIM (453) and Aer (14.2) (**Fig. 3a**).

124 The neutralizing titer in the BAL was highest in the Aer group (13.4) and neutralizing  
125 activity was detectable in 3 of 6 SIM pigs (**Fig. 3b**). There was no detectable neutralization in  
126 the BAL of IM immunized animals although haemagglutinin (HA) specific antibodies were  
127 present. High levels of anti-HA IgG were present in both IM and SIM groups (119.2 and 167  
128 respectively), while the highest titers of IgA were detected in the Aer and SIM groups (18.3  
129 and 46.6 respectively) (**Fig. 3b**). Only very low levels of NA inhibition were found in BAL  
130 compared to serum (**Fig. 3b**). We also evaluated the number of memory IgG and IgA HA  
131 specific B cells in spleen, tracheobronchial lymph nodes (TBLN) and blood. Very few  
132 antibody secreting cells (ASC) were found in the blood before challenge or in spleen at 4

133 DPC (**Fig. 3c**). HA specific IgG secreting ASC were detected in TBLN in the Aer (48  
134 ASC/10<sup>6</sup>) and in the SIM (25 ASC/10<sup>6</sup>) groups. A lower number of HA specific IgA ASC  
135 were present in these groups. Only 2 of 5 IM immunized pigs had HA specific IgG and IgA  
136 ASC in TBLN (**Fig. 3c**).

137 In summary, IM immunization with S-FLU induced high neutralizing Ab titres in  
138 serum, but a limited response in BAL, although HA specific antibodies were present. Aerosol  
139 delivery generated the highest neutralizing titers in BAL, but a very low serum response. The  
140 SIM group generated a high serum neutralizing titer, although only half the magnitude of IM  
141 alone, while the BAL response was lower than in Aer only, but still greater than IM.  
142 Statistically significant numbers of HA specific memory B cells were detected only in the  
143 Aer group in the local lung lymph nodes.

144

145 **Cytokine production by CD4 and CD8 cells in BAL.** We analyzed cytokine production of  
146 BAL T cells by intracellular staining following *ex vivo* stimulation with H1N1pdm09. No T  
147 cell response was detected in the BAL of the IM group. In contrast, Aer and SIM  
148 immunization induced a strong T cell response. CD8 T cells in the Aer and SIM groups  
149 secreted mainly IFN $\gamma$ , followed by TNF and the response in both groups was dominated by  
150 single IFN $\gamma$  producers (51%) followed by double secreting IFN $\gamma$ -TNF (36.2%) and a smaller  
151 proportion of triple secreting IFN $\gamma$ -TNF-IL2 cells (6.5%) (**Fig. 4a**). The only significant CD4  
152 responses were IFN $\gamma$  in Aer and SIM groups and there were few double or triple cytokine  
153 producing cells (**Fig. 4b**). Overall, Aer produced the strongest T cell response, dominated by  
154 IFN $\gamma$  producing cells. SIM induced similar T cells functions although the response was  
155 slightly lower in magnitude. Intra-muscular delivery did not generate virus specific T cell in  
156 the BAL at 4 DPC.

157

158 **NP specific tetramer responses in the respiratory tract and blood.** We enumerated S-  
159 FLU-specific CD8 T cells in blood and different parts of the respiratory tract (nasal  
160 turbinates, trachea, BAL and lung) using three NP epitope tetramers: NP<sub>290-298</sub> DFEREGYSL  
161 (DFE), NP<sub>101-109</sub> NGKWMRELI (NGK) and NP<sub>207-225</sub> IAYERMCNI (IAY), as previously described<sup>15</sup>  
162 (**Table 1**) (**Fig. 5a**). No responses were detected against the previously identified NP<sub>252-260</sub>  
163 EFEDLTFLA epitope in all immunized animals (data not shown).

164 In nasal turbinates, the response to IAY was the strongest (5% Aer, 1.4% IM and  
165 3.4% SIM), followed by DFE (2.4% Aer, 0.7% IM, 1.4% SIM) and NGK (2.2% Aer, 0.2%

166 IM, 1.5% SIM). The trachea showed similar specificity. The strongest response was detected  
167 in the BAL. NGK<sup>+</sup> CD8 T cells were the biggest population (13.4% in Aer and 13.8% in  
168 SIM) followed by IAY<sup>+</sup> (12.7% Aer, 9.4% SIM) and a lower response was found to DFE (6%  
169 Aer and 4.7% SIM). Strikingly no tetramer staining was found in the BAL of the IM group,  
170 in agreement with the lack of intracellular cytokine staining (**Fig. 4**). In the lung similar but  
171 lower tetramer specific responses were detected for Aer (5.5% NGK, 7.5% IAY and 3.5%  
172 DFE) and the SIM groups (7.9% NGK, 5% IAY and 4.0% DFE) (**Figs. 5a**).

173 In order to evaluate the hierarchy of tetramer responses in different tissues, we  
174 calculated the proportion of each tetramer among total tetramer<sup>+</sup> CD8 T cells (**Fig. 5b**). The  
175 proportions of IAY was much higher in all respiratory tissues compared to blood ( $p < 0.0001$   
176 for nasal turbinates compared to PBMC in the Aer group) (**Figs. 5a and b**). The NGK  
177 response in blood was greater compared to all respiratory tissues ( $p < 0.0001$  when nasal  
178 turbinates were compared with blood for the Aer group). In the IM group less NGK<sup>+</sup> cells  
179 were detected in all tissues compared to Aer and SIM. In particular, a significantly lower  
180 proportion of NGK<sup>+</sup> CD8 T cells was found in IM PBMC compared to Aer ( $p = 0.01$ ) although  
181 they were still the dominant NP specificity among CD8 T cells (57.1% of total tetramer<sup>+</sup> CD8  
182 T cells).

183 Finally, we assessed the numbers of tissue resident memory T cells (TRM) in the  
184 respiratory tissues by intravenous infusion of anti-porcine CD3 monoclonal antibody (mAb)  
185 as previously described<sup>12</sup> (**Figs. 6a and b**). The majority of cells in the BAL were  
186 inaccessible to the mAb (82.4% average of all 11 animals treated with anti-CD3 mAb) and  
187 therefore tissue resident. In the nasal turbinates and trachea 11.6% and 38.8% (average of all  
188 11 animals) of single *ex vivo* labelled CD3 cells (TRM) were detected, while in the lung 95%  
189 of the T cells were double positive, perhaps reflecting known difficulties in extracting TRM  
190 and blood contamination<sup>16</sup>. Tetramer positive cells were detected in both TRM and blood  
191 borne populations.

192 In summary, we detected strong NP-tetramer specific CD8 T cell responses in the  
193 nasal turbinates, trachea, BAL and lung of Aer and SIM immunized animals. IM induced  
194 much lower number of tetramer specific cells in all tissues and none in BAL. There was a  
195 different hierarchy of the response specificity in the respiratory tract compared to the blood,  
196 indicating that sampling blood does not represent responses in the local tissues.

197

198 **Discussion**

199 Here we investigated different routes of immunization to determine the most effective in  
200 providing protection against influenza A virus in pigs. We tested the traditional systemic  
201 (intra-muscular) route used routinely in pigs and humans for influenza immunization and  
202 respiratory mucosal immunization, as used with the newer LAIV. We also performed SIM,  
203 previously shown to be highly protective, able to induce long lasting immune response and  
204 perhaps similar to prime and “pull” immunization regimes that have been investigated  
205 recently<sup>5,7,8,17</sup>. In our experiments we administered S-FLU to the whole respiratory tract, a  
206 procedure that has been shown in mice to be superior to upper respiratory tract immunization  
207 in protecting against heterologous challenge<sup>18</sup>. We were able to do so safely, since S-FLU  
208 does not contain a viable RNA segment encoding HA. This obviates the two concerns that  
209 dictate restrictions of LAIV to the upper respiratory tract. Firstly, the low level of replication  
210 of temperature sensitive LAIV might cause lung pathology and, secondly when used to  
211 protect against pandemic influenza viruses reassortment of H5 or H7 with LAIV HA could  
212 occur<sup>9,11,12,19</sup>.

213 IM immunization induced a powerful neutralizing antibody response, and the viral  
214 load and lung pathology were both greatly reduced. However, T cell responses were weak in  
215 these animals and strikingly could not be detected in BAL at 4 DPC. Nor were neutralizing  
216 antibodies present in BAL, although it should be noted that harvesting BAL involves  
217 considerable dilution so low titers of antibodies may be missed. These data indicate that IM  
218 immunization fails to develop lung responses, as previously reported in mice with seasonal  
219 human inactivated vaccine<sup>20</sup>.

220 In contrast, in Aer animals, the serum neutralizing titer was much lower but  
221 neutralizing activity was detected in BAL. The viral load in nasal swabs was not reduced.  
222 There was a trend toward reduced gross and histopathology although this did not reach  
223 significance. Aer animals made powerful CD8 and CD4 responses, detectable in BAL, a site  
224 containing almost exclusively TRM<sup>12</sup>. Given the powerful T cell and neutralizing antibody  
225 responses in the BAL it is surprising that Aer animals showed minimal reduction in nasal  
226 virus shedding and a weak effect on pathology, although there was no virus in the BAL.  
227 Similarly in a previous experiment pigs immunized by aerosol with H3N2 S-FLU and  
228 challenged with heterologous H1N1pdm09 virus exhibited reduced lung pathology 5 DPC,  
229 but no reduction in virus shedding<sup>12</sup>. These data contrast with results in mice where TRM  
230 have been shown both to protect against weight loss following heterologous influenza  
231 challenge and to reduce viral load<sup>21-23</sup>. This suggests that T cell immunity in mice can both  
232 protect against clinical disease (weight loss) and reduce viral load, whereas in pigs a powerful



233 T cells response is insufficient to protect the upper respiratory tract from infection and  
234 shedding although the lung viral load and pathology are reduced. Parallel experiments using  
235 the same immunization regimes and challenge virus in pigs and ferrets, confirm that small  
236 animal models may not always predict the outcome in a large animal natural host, such as the  
237 pig<sup>12</sup>. Correlative studies in humans suggest that cross-reactive T cells provide partial  
238 protection against influenza infection<sup>24-26</sup>. Taken together these data suggest that in large  
239 animals, pigs and humans, cross-reactive T cell immunity can ameliorate severe disease but  
240 not prevent upper respiratory infection.

241 The SIM animals showed a combination of the properties of the two immunizations.  
242 There was a good serum neutralizing antibody response and neutralizing antibodies were also  
243 detected in BAL but, in contrast to IM immunized animals, there was a powerful CD4 and  
244 CD8 T cell response in the BAL, lungs and nasal turbinates. SIM animals showed greatly  
245 reduced viral load in nasal swabs and no detectable virus in BAL at 4 DPC together with  
246 reduced lung pathology. Our study shows that simultaneous systemic and aerosol  
247 immunization may have the advantage of providing both protection against homologous  
248 challenge, by induction of local and systemic neutralizing antibodies, and heterologous  
249 challenge, mediated by local and systemic T cells, including TRM. Systemic immunity may  
250 also be of benefit because influenza virus infection can also be systemic and serum  
251 neutralizing antibodies may abolish viremia<sup>27,28</sup>. A heterologous challenge of SIM animals  
252 would be extremely interesting and confirm whether this immunization regime is truly  
253 advantageous.

254 Simultaneous and prime pull immunization regimes have had mixed success. While  
255 systemic prime followed by skin or reproductive tract pull successfully generated protective  
256 TRM in these tissues, it has been less easy to protect the respiratory tract by the same  
257 strategy<sup>29,30</sup>. Our earlier experiments with BCG in mice and cattle showed that simultaneous  
258 parenteral and intra-nasal administration of BCG provided improved protection, which we  
259 attributed to earlier local control of mycobacterial replication in the lungs post challenge<sup>5,6</sup>.  
260 However, others have not replicated this in primates<sup>31</sup>. Similarly, immunization with an intra-  
261 nasal lentiviral Tb vaccine containing antigen 85A (“pull”) after BCG prime failed to  
262 improve protection<sup>32</sup>. On the other hand, simultaneous immunization against influenza virus  
263 with an adenoviral vector in mice provided improved protection for up to 8 months compared  
264 to subcutaneous or intra-nasal immunisation alone and TRM generated by this immunization  
265 regime replicated in situ<sup>7,8</sup>. These differing outcomes may be partly explained by the need for  
266 additional signals as well as the antigen. For example, an adenoviral but not vesicular

267 stomatitis virus vectored “pull” improved anti-Tb protection in mice<sup>33</sup> and an adenoviral  
268 vector encoding nucleoprotein and 4-1BB ligand enhanced protection against influenza virus,  
269 compared to nucleoprotein alone<sup>34</sup>. In the present study, IM S-FLU generated very weak T  
270 cell responses and the data provide little evidence for recruitment of systemic T cells to the  
271 respiratory tract following infection (“pull”). However, IM S-FLU induce strong neutralizing  
272 antibody response, an essential component of influenza vaccines, but the effectiveness of the  
273 SIM regime might be improved by a systemic immunization able to generate a stronger  
274 circulating memory T cell reservoir, important for the replenishment of local responses<sup>35</sup>.

275 While local immune responses are important and, when combined with systemic  
276 responses, may provide optimal protection, it is fundamental to know how long they persist.  
277 Lung TRM have been shown to be short lived in mice, perhaps as a consequence of the high  
278 oxygen tension of the lung microenvironment<sup>35,36</sup>. However, experiments examining the  
279 persistence of influenza specific memory indicate that a dividing lung memory population  
280 may persist for many months if antigen is retained in the lung<sup>7</sup>. Our data using Ad85A  
281 vaccine showed that lung cells from mice immunised 23 weeks previously could stimulate  
282 85A specific T cells to divide, indicating long term persistence of antigen<sup>17</sup>.

283 Our data illustrate another factor that may partly explain why some regimes have not  
284 worked. While we have not analyzed the entire T cell repertoire in detail, the different  
285 hierarchy of specificities of tetramer+ CD8 T cells in IM compared to Aer animals suggests  
286 that the route of immunization can affect the T cell epitope specificity. Others have found  
287 that local cognate antigen recognition is fundamental for establishment of influenza specific  
288 TRM<sup>37,38</sup> and that local immunodominance is not always found in the circulating T cell pool,  
289 although it remains to be shown conclusively whether these differences in immunodominance  
290 affect protection<sup>39</sup>.

291 Our results in this pig influenza challenge model indicate that SIM may offer  
292 advantages in protection against influenza viruses. SIM induces an excellent systemic  
293 antibody response, known to correlate with protection against homologous virus infection, as  
294 well as a powerful local TRM response, vital for protection against heterologous virus  
295 challenge. We suggest that development of SIM strategies for other respiratory pathogens  
296 including SARS CoV-2, may be advantageous in providing both local protection and a high  
297 titer of antibody. SIM strategies should also take into account the need for local co-  
298 stimulatory signals and persistence of antigen in the lung.

299 **Materials and methods**

300 **Vaccine and virus challenge.** The H1N1 signal minus influenza vaccine (S-FLU)  
301 [eGFP\*/N1(A/Eng/195/2009)] H1(A/Eng/195/2009) containing the internal genes of  
302 A/Puerto Rico/8/1934 virus was produced as previously described<sup>9</sup>. The swine isolate H1N1  
303 A/swine/England/1353/2009 (H1N1pdm09) was used to infect the pigs.

304

305 **Animal immunization and challenge study.** The animal experiment was approved by the  
306 ethical review process at Animal and Plant Health Agency (APHA) and followed the UK  
307 Government Animal (Scientific Procedures) Act 1986. Twenty-four 5-6 weeks old Babraham  
308 large white inbred female and male pigs were randomised into four groups of 6 animals as  
309 follows: 1) the first group received S-FLU by Aerosol as previously described<sup>12</sup> (Aer); 2) the  
310 second group was immunized intra-muscularly with S-FLU (IM); 3) the third group was  
311 immunized simultaneously intra-muscularly and by aerosol with S-FLU (SIM) and 4)  
312 unimmunized control group. Two pigs reached their humane end points due to a pre-existing  
313 heart condition, limiting the number of pigs in the control and IM groups to 5 animals.  
314 During immunization, all the animals were sedated with a cocktail of 4.4mg/kg Zoletil  
315 (Virbac, UK) and 0.044mg/kg Domitor (Orion Pharma, UK). Aerosol immunization was  
316 performed using a small droplet size vibrating mesh nebuliser (Aerogen Solo, Aerogen Ltd,  
317 Ireland) attached to a custom-made veterinary mask<sup>12</sup>. For Aer immunization 2 ml of S-FLU  
318 containing  $7 \times 10^7$  TCID<sub>50</sub> S-FLU was administered over 6-10 minutes. For IM administration,  
319 the vaccine stock was diluted to a final volume of 4 ml containing  $7 \times 10^7$  TCID<sub>50</sub> and 2 ml  
320 were administered to each trapezius muscle behind the ear. Pigs in the SIM group received 2  
321 ml of  $3.5 \times 10^7$  TCID<sub>50</sub> S-FLU by aerosol (as described above) and  $3.5 \times 10^7$  TCID<sub>50</sub> S-FLU  
322 delivered in 4 ml IM(2 x 2 ml in each trapezius muscle). The animals were boosted 3 weeks  
323 later in a similar manner. Three weeks after the boost, all groups were challenged with  
324  $2.8 \times 10^6$  PFU of H1N1pdm09 intranasally using a mucosal atomisation device (MAD300,  
325 Wolfe-Tory Medical). For logistic reason, the challenge was performed in 2 different days so  
326 that half of the animal in each group were challenged on day 23 post boost and the remaining  
327 half on day 25 post boost. Animals were humanely culled at day 4 post challenge (DPC) with  
328 an overdose of pentobarbital sodium anaesthetic. At the second cull, 1 mg/kg of anti CD3  
329 purified mAb (PPT3 clone, produced in house) was infused intravenously to the pigs, 10  
330 minutes prior to sacrifice. Since no difference was found in analyses of the samples  
331 challenged on different days, the results are presented together. Gross and histopathological  
332 analyses were performed as previously described<sup>11,12,40</sup>.

333

334 **Tissue Sample Processing.** Blood, spleen, broncho-alveolar lavage (BAL) and lung lobes  
335 were processed as described previously<sup>11,12</sup>. Trachea and nasal turbinate mucosae were  
336 separated from cartilage with tweezers and digested for 2 hours at 37°C in RPMI 1640  
337 supplemented with 100 U/ml penicillin, 100 mg/ml streptomycin, 2 mM L-glutamine (all  
338 from Gibco, UK), 2mg/ml collagenase D (Roche, US), 1mg/ml dispase and 1mg/ml of DNase  
339 (both from Sigma-Aldrich, UK). Tissues filaments were then mashed with the plunger of a  
340 syringe. Isolated cells were then passed through a 70µm cell strainer and red blood cell lysed  
341 before cryopreservation in FCS and 10% DMSO. Nasal swabs (one per nostril) were taken  
342 daily following infection with H1N1pdm09. Viral titer in nasal swabs and BAL was  
343 determined by plaque assay on MDCK cells as previously described<sup>11</sup>.

344

345 **Serological assays.** ELISA was performed using recombinant HA (from  
346 A/England/195/2009) containing a C-terminal thrombin cleavage site, a trimerization  
347 sequence, a hexahistidine tag and a BirA recognition sequence as previously described<sup>41</sup>.  
348 Microneutralization (MN) was performed using standard procedures as described  
349 previously<sup>9,40</sup>.

350 **Enzyme-Linked Lectin Assay (ELLA).** ELLA was used to quantify neutralization of  
351 neuraminidase (NA) enzymatic activity by antibody as described before<sup>42</sup>. Briefly, NUNC  
352 Immuno 96 microwell plates (Sigma-Aldrich, UK) were coated overnight at 4°C with 25  
353 µg/ml fetuin (Sigma-Aldrich, UK) in PBS containing 0.02% sodium azide. Heat inactivated  
354 sera and BAL were serially diluted in DMEM supplemented with 0.1% BSA, 100 U/ml  
355 penicillin, 100 mg/ml streptomycin and 2 mM L-glutamine starting at 1:40 and 1:4  
356 respectively. H7N1 S-FLU [eGFP/N1(A/Eng/09)] H7(Netherlands/219/2003) was used to  
357 minimize any potential steric effect of antibodies binding to H1 HA. An optimal  
358 concentration of H7N1 S-FLU was added to the diluted antibodies for 20 minutes on a plate  
359 shaker. 100 µl of the mixture of virus and diluted samples were then transferred to the  
360 washed coated plate and incubated for 18 hours at 37°C. Peanut agglutinin conjugated with  
361 HRP (Sigma-Aldrich, UK) was added at 1 µg/mL in PBS and incubated at room temperature  
362 for 2 hours. The plates were washed and developed with 50 µl TMB (Biolegend, UK); after 5  
363 minutes the reaction was stopped with 50 µl 1M sulfuric acid and absorbance measured at  
364 450 and 630 nm. The 50% inhibition titre was calculated as the highest dilution above the

365 50% inhibition line (midpoint between the signal generated by virus only and medium only  
366 wells).

367

368 **B cell ELISpot assay.** Cryopreserved lymphocytes from blood, spleen and TBLN were used.  
369  $10^7$  cells/well were stimulated in each well of a 12 well plate with the TLR7 agonist R484 at  
370  $1\mu\text{g/ml}$  in RPMI 1640 supplemented with 100 U/ml penicillin, 100 mg/ml streptomycin, 10%  
371 FBS and 0.1%  $\beta$  mercaptoethanol (all from Gibco, UK). After 48 hours, cells were washed  
372 twice with medium and counted.  $5 \times 10^5$  cells were distributed in duplicate in assay plates, for  
373 the detection of HA specific antibody secreting cells and in negative control wells, while  
374  $0.5 \times 10^5$  cells per well were plated to detect all Ig secreting cells (positive controls). Assay  
375 plates were MultiScreen™-HA ELISpot plates (Merck, Millipore, UK), coated with anti-  
376 porcine IgG, clone MT421 (Mabtech, Sweden), or anti-porcine IgA, A100-102A (Bethyl,  
377 US) 1/500 in carbonate buffer overnight at 4°C. After overnight incubation at 37°C, the  
378 plates were washed 5 times with PBS containing 0.05% Tween 20 and incubated with  
379 biotinylated HA for detection of HA specific B cells (obtained as described before),  
380 biotinylated Keyhole limpet hemocyanin (KLH) (Sigma-Aldrich, UK) as a negative control,  
381 both at  $0.1\mu\text{g/ml}$  in PBS, or biotinylated anti-porcine IgG (MT424, Mabtech, US) or anti-  
382 porcine IgA (A100-102-B, Bethyl, Sweden) at 1/1000 in PBS to detect all Ig secreting cells.  
383 After 2 hours incubation, plates were washed and streptavidin alkaline phosphatase  
384 (Invitrogen, UK) added for another hour. The plates were then developed and read. Spots  
385 detected with KLH were subtracted from the HA response and data presented as antibody  
386 secreting cells (ASC) per million cells.

387

388 **Flow cytometry.** Cryopreserved lymphocytes from BAL were thawed and stimulated with  
389 H1N1pdm09 (MOI 1) or medium as a control for 18 hours at 37°C prior GolgiPlug (BD  
390 Biosciences, UK) addition as per manufacturer instructions. Following 5 hours incubation  
391 with GolgiPlug at 37°C, cells were stained with surface markers (**Table 1**) before fixation  
392 and permeabilization using Cytofix Cytoperm (BD Biosciences, UK). Intracellular staining  
393 was then performed, and the samples were analysed using an LSRFortessa (BD Biosciences).  
394 Data was analysed by Boolean gating using FlowJo v10 (Treestar). For identification of  
395 TRM, three animals from each vaccinated group and two control animals were infused i.v.  
396 with 1 mg/kg of purified CD3 mAb (clone PPT3) and sacrificed 10 min later, as described  
397 above. Cryopreserved lymphocytes isolated from the different tissues were labelled with anti-

398 mouse IgG1-APC, which labels the circulating intravascular cells, for 20 min at 4°C. After  
399 two washes with PBS, normal mouse serum was added to block any remaining binding sites  
400 of the secondary Ab. The lymphocytes were then stained with surface markers (**Table 1**),  
401 including anti-porcine CD3-FITC (clone PPT3, BioRad, UK). As not all CD3 sites would be  
402 saturated by intravenous anti-CD3 mAb, circulating T cells are double labelled, while tissue  
403 resident T cells are positive only for the *ex vivo* anti CD3-FITC.

404 NP-tetramer staining was performed on cryopreserved lymphocytes from PBMC,  
405 lung, BAL, trachea and nasal turbinate as previously described<sup>15</sup>. Briefly, biotinylated NP  
406 peptide loaded SLA monomers were freshly assembled into tetramer with streptavidin  
407 BV421 or BV650 (both from Biolegend, UK). Two million mononuclear cells were  
408 incubated with protease kinase inhibitor in PBS for 30 minutes at 37°C and tetramers added  
409 to the cells on ice for another 30 minutes. Surface staining with optimal antibodies  
410 concentration in FACS buffer (PBS supplemented with 2% FCS and 0.05% sodium azide)  
411 was performed on ice for 20 minutes (**Table 1**). Samples were washed twice with FACS  
412 buffer and fixed in 1% paraformaldehyde before analysis using an LSRFortessa (BD  
413 Biosciences).

414

415 **Statistical analysis.** GraphPad version 8.4.1 was used for statistical analysis. Kruskal-Wallis  
416 test was used for the comparison between groups of viral load, pathology, antibody and T  
417 cells responses. Two-way ANOVA was used for the comparison of neutralizing antibody and  
418 to analyse the hierarchy of the response in the different tissues within the same group.

419

420 **Data availability:** The datasets generated during the reported study are available on request  
421 from the corresponding authors.

422

423 **Acknowledgements:** We are grateful to the animal staff for excellent animal care. We thank  
424 the Pirbright flow cytometry facility for their support and Kelly Roper and Emily Bessell for  
425 help with sample processing. We thank APHA for providing the challenge swine  
426 A/Sw/Eng/1353/09 influenza virus strain (DEFRA SwIV surveillance programme SW3401).

427

428 **Authors contribution:** ET, AT, PB, VM conceived, designed and coordinated the study.  
429 VM, ET, AM, BP, TC, ME, EM, BC, GD, AS, PB, RM, AT designed and performed  
430 experiments, processed samples and analyzed the data. AN carried out postmortem and

431 pathological analysis. ET, PB, VM, AT, wrote the manuscript. All authors read and  
432 commented on the manuscript.

433

434 **Competing interests:** AT is named on a patent concerning the use of S-FLU as a vaccine.  
435 RM is employed by Aerogen Limited, focused on development of vibrating mesh nebulizer  
436 technologies. The other authors have no financial conflicts of interest.

437

438 **Funding:** This work was supported by the Biotechnology and Biological Sciences Research  
439 Council (BBSRC) grants BBS/E/I/00007031, sLoLa Grant BB/L001330/1 and  
440 BBS/E/I/00007039 (National capability science services). A T. is funded by the Chinese  
441 Academy of Medical Sciences (CAMS) Innovation Fund for Medical Sciences (CIFMS),  
442 China Grant 2018-I2M-2-002, the Townsend-Jeantet Prize Charitable Trust (charity number  
443 1011770) and the Medical Research Council (MRC) Grant MR/P021336/1.

## 444 References

- 445 1 Osterholm, M. T., Kelley, N. S., Sommer, A. & Belongia, E. A. Efficacy and effectiveness of  
446 influenza vaccines: a systematic review and meta-analysis. *The Lancet. Infectious diseases*  
447 **12**, 36-44, doi:10.1016/s1473-3099(11)70295-x (2012).
- 448 2 Hoft, D. F. *et al.* Live and inactivated influenza vaccines induce similar humoral responses,  
449 but only live vaccines induce diverse T-cell responses in young children. *J Infect Dis* **204**, 845-  
450 853, doi:10.1093/infdis/jir436 (2011).
- 451 3 Mohn, K. G. I., Zhou, F., Brokstad, K. A., Sridhar, S. & Cox, R. J. Boosting of Cross-Reactive and  
452 Protection-Associated T Cells in Children After Live Attenuated Influenza Vaccination. *J Infect*  
453 *Dis* **215**, 1527-1535, doi:10.1093/infdis/jix165 (2017).
- 454 4 Santosuosso, M., McCormick, S., Zhang, X., Zganiacz, A. & Xing, Z. Intranasal boosting with an  
455 adenovirus-vectored vaccine markedly enhances protection by parenteral Mycobacterium  
456 bovis BCG immunization against pulmonary tuberculosis. *Infect Immun* **74**, 4634-4643,  
457 doi:10.1128/IAI.00517-06 (2006).
- 458 5 Dean, G. S. *et al.* Protection Induced by Simultaneous Subcutaneous and Endobronchial  
459 Vaccination with BCG/BCG and BCG/Adenovirus Expressing Antigen 85A against  
460 Mycobacterium bovis in Cattle. *PLoS One* **10**, e0142270, doi:10.1371/journal.pone.0142270  
461 (2015).
- 462 6 Tchilian, E. Z. *et al.* Simultaneous immunization against tuberculosis. *PLoS One* **6**, e27477,  
463 doi:10.1371/journal.pone.0027477 (2011).
- 464 7 Uddback, I. *et al.* Long-term maintenance of lung resident memory T cells is mediated by  
465 persistent antigen. *Mucosal Immunol*, doi:10.1038/s41385-020-0309-3 (2020).
- 466 8 Uddback, I. E. *et al.* Combined local and systemic immunization is essential for durable T-cell  
467 mediated heterosubtypic immunity against influenza A virus. *Sci Rep* **6**, 20137,  
468 doi:10.1038/srep20137 (2016).
- 469 9 Powell, T. J., Silk, J. D., Sharps, J., Fodor, E. & Townsend, A. R. Pseudotyped influenza A virus  
470 as a vaccine for the induction of heterotypic immunity. *J Virol* **86**, 13397-13406,  
471 doi:10.1128/JVI.01820-12 (2012).
- 472 10 Baz, M. *et al.* Nonreplicating Influenza A Virus Vaccines Confer Broad Protection against  
473 Lethal Challenge. *MBio* **6**, doi:10.1128/mBio.01487-15 (2015).
- 474 11 Morgan, S. B. *et al.* Aerosol Delivery of a Candidate Universal Influenza Vaccine Reduces Viral  
475 Load in Pigs Challenged with Pandemic H1N1 Virus. *J Immunol* **196**, 5014-5023,  
476 doi:10.4049/jimmunol.1502632 (2016).
- 477 12 Holzer, B. *et al.* Comparison of Heterosubtypic Protection in Ferrets and Pigs Induced by a  
478 Single-Cycle Influenza Vaccine. *J Immunol* **200**, 4068-4077, doi:10.4049/jimmunol.1800142  
479 (2018).
- 480 13 Janke, B. H. Influenza A virus infections in swine: pathogenesis and diagnosis. *Vet Pathol* **51**,  
481 410-426, doi:10.1177/0300985813513043 (2014).
- 482 14 Rajao, D. S. & Vincent, A. L. Swine as a model for influenza A virus infection and immunity.  
483 *ILAR J* **56**, 44-52, doi:10.1093/ilar/ilv002 (2015).
- 484 15 Tungatt, K. *et al.* Induction of influenza-specific local CD8 T-cells in the respiratory tract after  
485 aerosol delivery of vaccine antigen or virus in the Babraham inbred pig. *PLoS Pathog* **14**,  
486 e1007017, doi:10.1371/journal.ppat.1007017 (2018).
- 487 16 Steinert, E. M. *et al.* Quantifying Memory CD8 T Cells Reveals Regionalization of  
488 Immunosurveillance. *Cell* **161**, 737-749, doi:10.1016/j.cell.2015.03.031 (2015).
- 489 17 Ronan, E. O., Lee, L. N., Beverley, P. C. & Tchilian, E. Z. Immunization of mice with a  
490 recombinant adenovirus vaccine inhibits the early growth of Mycobacterium tuberculosis  
491 after infection. *PLoS One* **4**, e8235, doi:10.1371/journal.pone.0008235 (2009).
- 492 18 Lau, Y. F., Wright, A. R. & Subbarao, K. The contribution of systemic and pulmonary immune  
493 effectors to vaccine-induced protection from H5N1 influenza virus infection. *J Virol* **86**, 5089-  
494 5098, doi:10.1128/JVI.07205-11 (2012).



- 495 19 Ambrose, C. S. & Coelingh, K. L. Small-particle aerosolization of live attenuated influenza  
496 vaccine virus. *J Infect Dis* **205**, 348; author reply 348-349, doi:10.1093/infdis/jir736 (2012).
- 497 20 Zens, K. D., Chen, J. K. & Farber, D. L. Vaccine-generated lung tissue-resident memory T cells  
498 provide heterosubtypic protection to influenza infection. *JCI Insight* **1**,  
499 doi:10.1172/jci.insight.85832 (2016).
- 500 21 Teijaro, J. R. *et al.* Cutting edge: Tissue-retentive lung memory CD4 T cells mediate optimal  
501 protection to respiratory virus infection. *J Immunol* **187**, 5510-5514,  
502 doi:10.4049/jimmunol.1102243 (2011).
- 503 22 Wu, T. *et al.* Lung-resident memory CD8 T cells (TRM) are indispensable for optimal cross-  
504 protection against pulmonary virus infection. *J Leukoc Biol* **95**, 215-224,  
505 doi:10.1189/jlb.0313180 (2014).
- 506 23 McMaster, S. R., Wilson, J. J., Wang, H. & Kohlmeier, J. E. Airway-Resident Memory CD8 T  
507 Cells Provide Antigen-Specific Protection against Respiratory Virus Challenge through Rapid  
508 IFN-gamma Production. *J Immunol* **195**, 203-209, doi:10.4049/jimmunol.1402975 (2015).
- 509 24 Sridhar, S. *et al.* Cellular immune correlates of protection against symptomatic pandemic  
510 influenza. *Nat Med* **19**, 1305-1312, doi:10.1038/nm.3350 (2013).
- 511 25 Hayward, A. C. *et al.* Natural T Cell-mediated Protection against Seasonal and Pandemic  
512 Influenza. Results of the Flu Watch Cohort Study. *Am J Respir Crit Care Med* **191**, 1422-1431,  
513 doi:10.1164/rccm.201411-1988OC (2015).
- 514 26 McMichael, A. J., Gotch, F. M., Noble, G. R. & Beare, P. A. Cytotoxic T-cell immunity to  
515 influenza. *N Engl J Med* **309**, 13-17, doi:10.1056/NEJM198307073090103 (1983).
- 516 27 To, K. K. *et al.* Delayed clearance of viral load and marked cytokine activation in severe cases  
517 of pandemic H1N1 2009 influenza virus infection. *Clin Infect Dis* **50**, 850-859,  
518 doi:10.1086/650581 (2010).
- 519 28 Oughton, M. *et al.* Evidence of viremia in 2 cases of severe pandemic influenza A H1N1/09.  
520 *Diagn Microbiol Infect Dis* **70**, 213-217, doi:10.1016/j.diagmicrobio.2010.12.013 (2011).
- 521 29 Mackay, L. K. *et al.* Long-lived epithelial immunity by tissue-resident memory T (TRM) cells in  
522 the absence of persisting local antigen presentation. *Proc Natl Acad Sci U S A* **109**, 7037-  
523 7042, doi:10.1073/pnas.1202288109 (2012).
- 524 30 Shin, H. & Iwasaki, A. A vaccine strategy that protects against genital herpes by establishing  
525 local memory T cells. *Nature* **491**, 463-467, doi:10.1038/nature11522 (2012).
- 526 31 Darrach, P. A. *et al.* Prevention of tuberculosis in macaques after intravenous BCG  
527 immunization. *Nature* **577**, 95-102, doi:10.1038/s41586-019-1817-8 (2020).
- 528 32 Britton, G., MacDonald, D. C., Brown, J. S., Collins, M. K. & Goodman, A. L. Using a prime and  
529 pull approach, lentivector vaccines expressing Ag85A induce immunogenicity but fail to  
530 induce protection against *Mycobacterium bovis* bacillus Calmette-Guerin challenge in mice.  
531 *Immunology* **146**, 264-270, doi:10.1111/imm.12498 (2015).
- 532 33 Jeyanathan, M. *et al.* Differentially imprinted innate immunity by mucosal boost vaccination  
533 determines antituberculosis immune protective outcomes, independent of T-cell immunity.  
534 *Mucosal Immunol* **6**, 612-625, doi:10.1038/mi.2012.103 (2013).
- 535 34 Zhou, A. C., Wagar, L. E., Wortzman, M. E. & Watts, T. H. Intrinsic 4-1BB signals are  
536 indispensable for the establishment of an influenza-specific tissue-resident memory CD8 T-  
537 cell population in the lung. *Mucosal Immunol* **10**, 1294-1309, doi:10.1038/mi.2016.124  
538 (2017).
- 539 35 Slutter, B. *et al.* Dynamics of influenza-induced lung-resident memory T cells underlie waning  
540 heterosubtypic immunity. *Sci Immunol* **2**, doi:10.1126/sciimmunol.aag2031 (2017).
- 541 36 Hayward, S. L. *et al.* Environmental cues regulate epigenetic reprogramming of airway-  
542 resident memory CD8(+) T cells. *Nat Immunol* **21**, 309-320, doi:10.1038/s41590-019-0584-x  
543 (2020).
- 544 37 Wakim, L. M., Smith, J., Caminschi, I., Lahoud, M. H. & Villadangos, J. A. Antibody-targeted  
545 vaccination to lung dendritic cells generates tissue-resident memory CD8 T cells that are

546 highly protective against influenza virus infection. *Mucosal Immunol* **8**, 1060-1071,  
547 doi:10.1038/mi.2014.133 (2015).  
548 38 McMaster, S. R. *et al.* Pulmonary antigen encounter regulates the establishment of tissue-  
549 resident CD8 memory T cells in the lung airways and parenchyma. *Mucosal Immunol* **11**,  
550 1071-1078, doi:10.1038/s41385-018-0003-x (2018).  
551 39 Pizzolla, A. *et al.* Resident memory CD8(+) T cells in the upper respiratory tract prevent  
552 pulmonary influenza virus infection. *Sci Immunol* **2**, doi:10.1126/sciimmunol.aam6970  
553 (2017).  
554 40 McNee, A. *et al.* Establishment of a Pig Influenza Challenge Model for Evaluation of  
555 Monoclonal Antibody Delivery Platforms. *J Immunol*, doi:10.4049/jimmunol.2000429 (2020).  
556 41 Huang, K. Y. *et al.* Focused antibody response to influenza linked to antigenic drift. *J Clin*  
557 *Invest* **125**, 2631-2645, doi:10.1172/JCI81104 (2015).  
558 42 Rijal, P. *et al.* Broadly inhibiting anti-neuraminidase monoclonal antibodies induced by  
559 trivalent influenza vaccine and H7N9 infection in humans. *J Virol*, doi:10.1128/JVI.01182-19  
560 (2019).  
561

# Figure 1

(which was not certified by peer review) is the author/funder, who has granted bioRxiv a license to display the preprint in perpetuity. It is made available under aCC-BY-ND 4.0 International license.

H1N1pdm09 challenge

Anti CD3 mAb

a

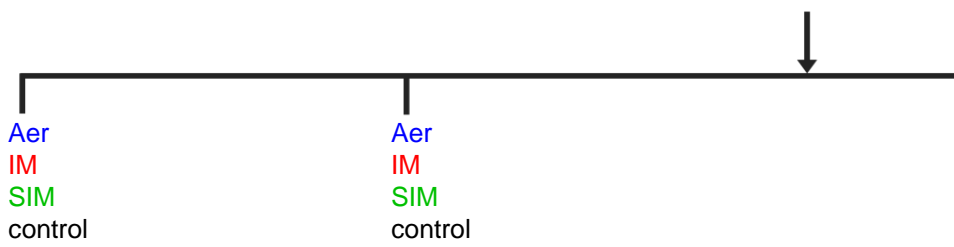

b

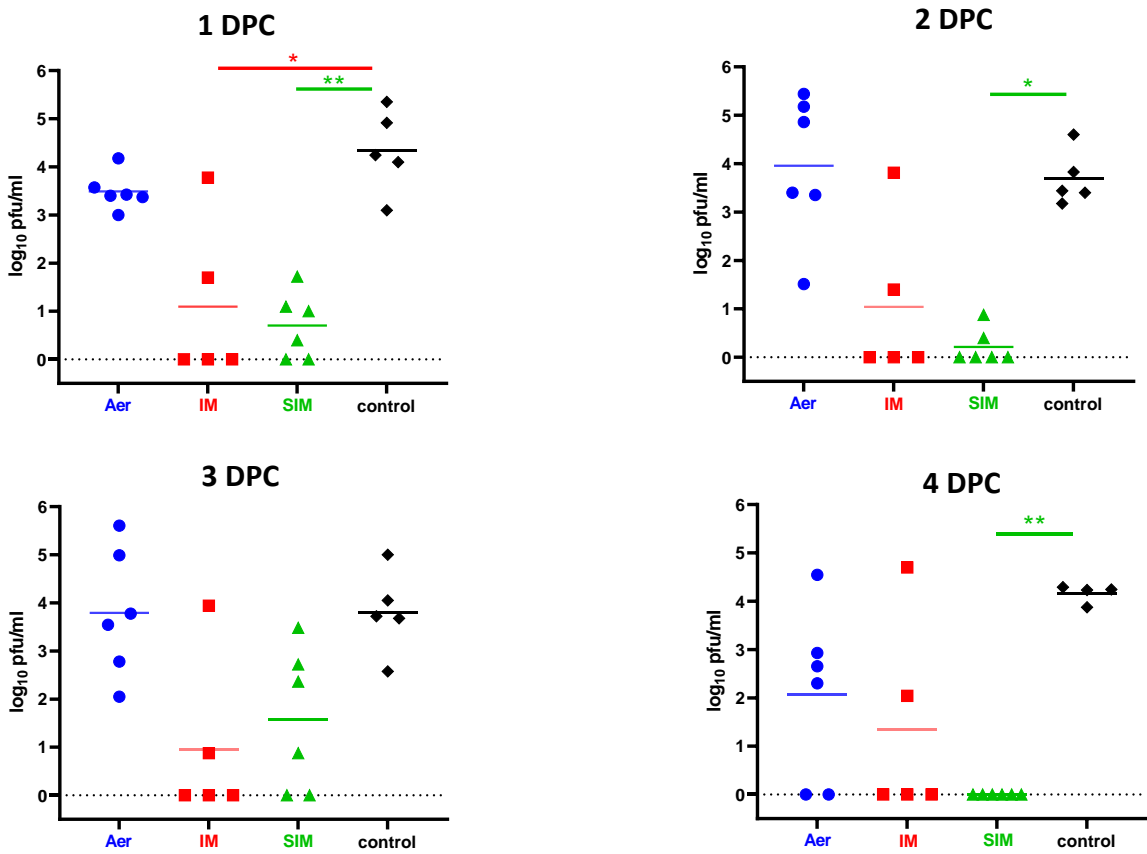

c

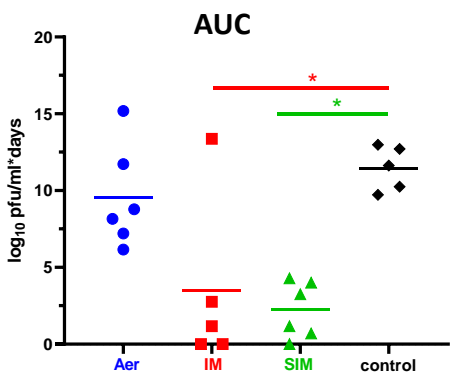

d

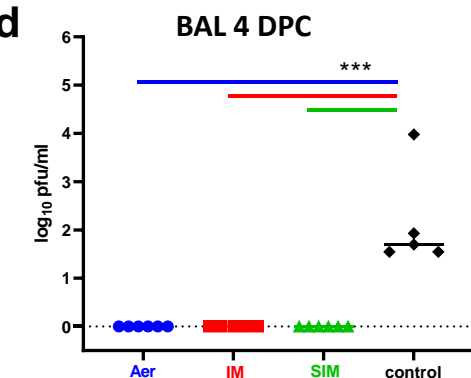

**Figure 1. Experimental design and viral load in nasal swabs and BAL.** (a) Babraham pigs were immunized with S-FLU by aerosol (Aer), intramuscularly (IM) or simultaneously by Aer and IM (SIM) and boosted 3 weeks apart. Control animals were left untreated. All animals were challenged with H1N1pdm09 virus 3 weeks after the boost. Swabs were taken daily post challenge and all pigs were culled 4 days post challenge (4 DPC). Half of the pigs were infused intravenously with anti-porcine CD3 mAb 10 minutes prior to sacrifice. (b) Virus titre in nasal swabs measured by plaque assay at 1, 2, 3 and 4 DPC. (c) Area under the curve (AUC) of viral titre in the nasal swabs over time. (d) Viral titre in the broncho-alveolar lavage (BAL) 4 DPC. The data represents the average of 2 separate assays, each data points indicates an individual animal and the horizontal line the mean of the group. Data were analysed using the Kruskal-Wallis test. Asterisks indicate significant difference from the control group \*p<0.05, \*\*p<0.01, \*\*\*p<0.001.

## Figure 2

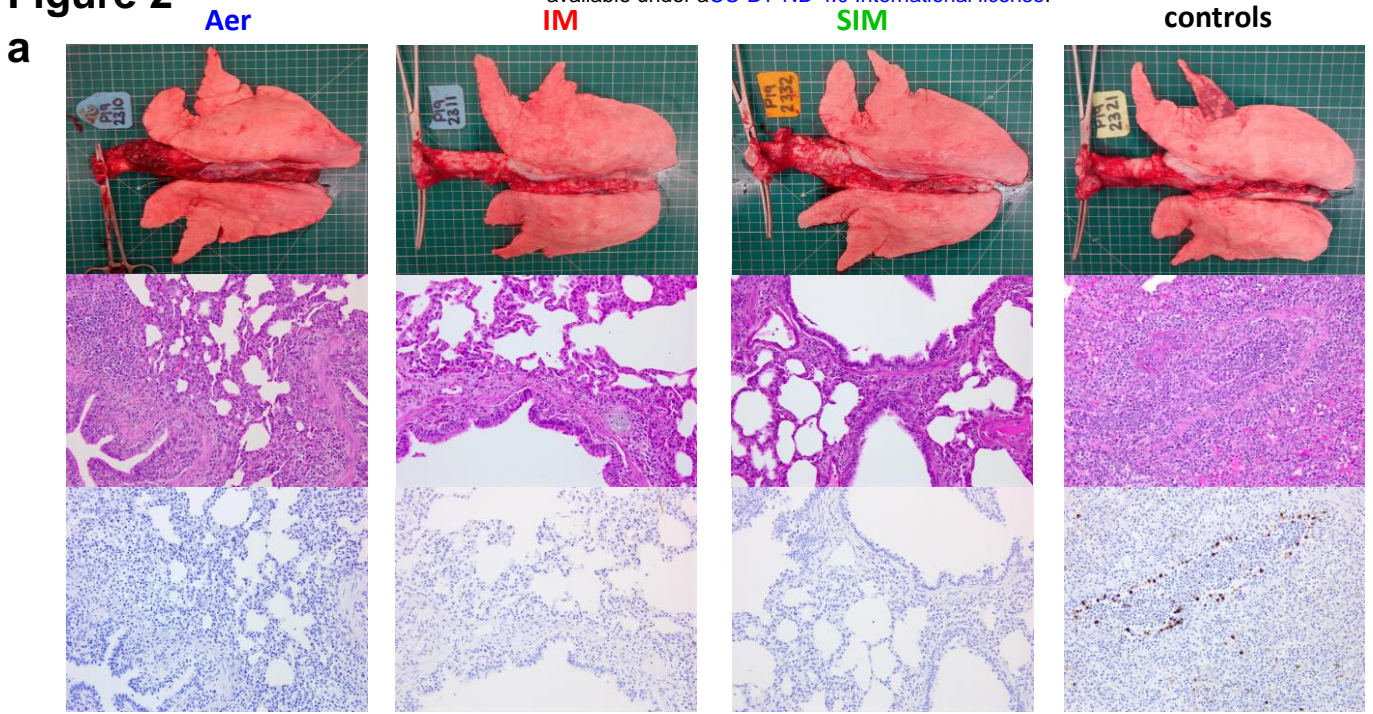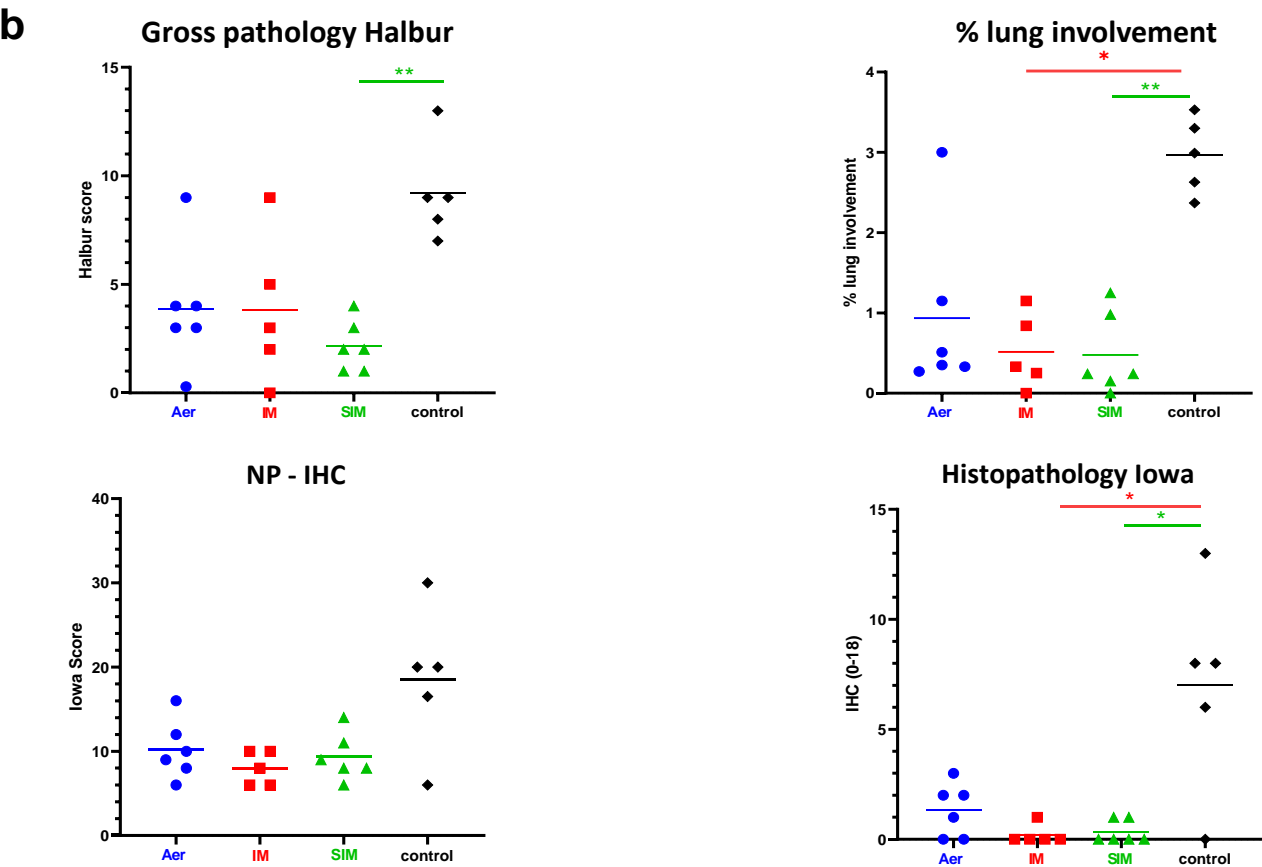

**Figure 2. Lung pathology.** Pigs were immunized with S-FLU by aerosol (Aer), intramuscularly (IM) or simultaneously by Aer and IM (SIM) while control pigs were untreated. Three weeks post boost pigs were challenged with H1N1pdm09. The animals were euthanized at 4 DPC and lungs scored for appearance of gross and histopathological lesions. Representative gross pathology, histopathology (H&E staining; 100x) and immunohistochemical NP staining (200x) for each group are shown (a). The gross and histopathological scores for each individual in a group and the group means are shown (b), including the percentage of lung surface with lesions, the lesion scores and the histopathological scores (“Iowa” includes the NP staining). Pathology scores were analysed using one-way non-parametric ANOVA with the Kruskal-Wallis test. Asterisks denote significant differences \*p<0.05 and \*\*p<0.01 compared to control.

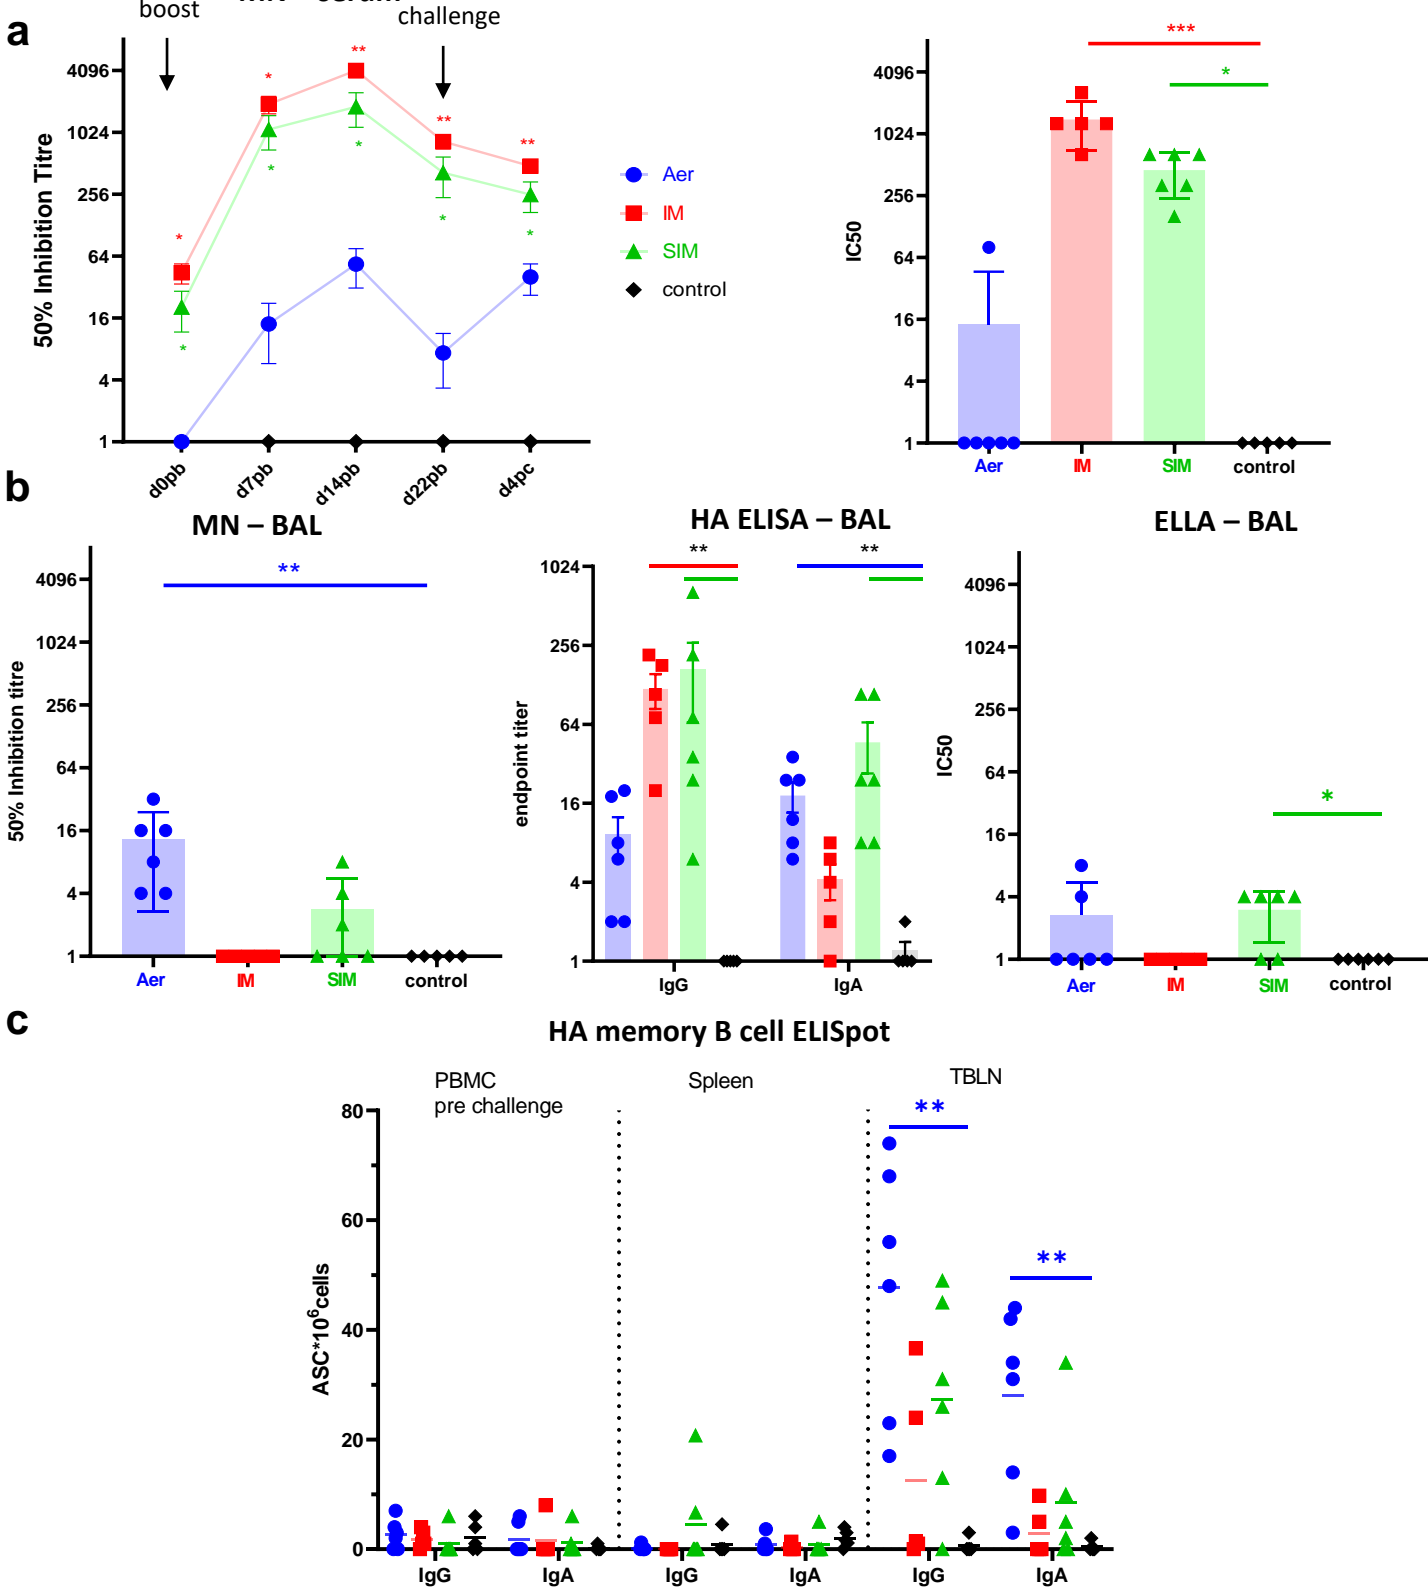

**Figure 3. Systemic and local antibody responses.** (a) Serum neutralizing titers over time were determined by microneutralization (MN) (here shown as mean and SEM of two independent assays). NA inhibition activity was assessed by enzyme linked lectin assay (ELLA) at 4 DPC. (b) BAL fluid was taken at 4 DPC and virus neutralization was analyzed by MN, HA specific IgG and IgA titers were measured by ELISA, and NA inhibition was assessed by ELLA. Each data point represents an individual animal. Each serum and BAL sample was assayed twice and a mean computed. (c) HA specific memory B cells were detected by ELISpot in PBMC (pre-challenge), spleen and tracheobronchial lymph node (TBLN) 4 DPC. Each animal is represented by a symbol and the mean is shown as a bar. Asterisks denote significance compared to control group (\* $p < 0.05$ , \*\* $p < 0.01$ , \*\*\*  $p < 0.001$ ). Serum neutralization was analyzed with two-way ANOVA while Kruskal-Wallis test was used for the analysis of NA neutralisation in sera, BAL samples and ELISpot data.

# Figure 4

(which was not certified by peer review) is the author/funder, who has granted bioRxiv a license to display the preprint in perpetuity. It is made available under aCC-BY-ND 4.0 International license.

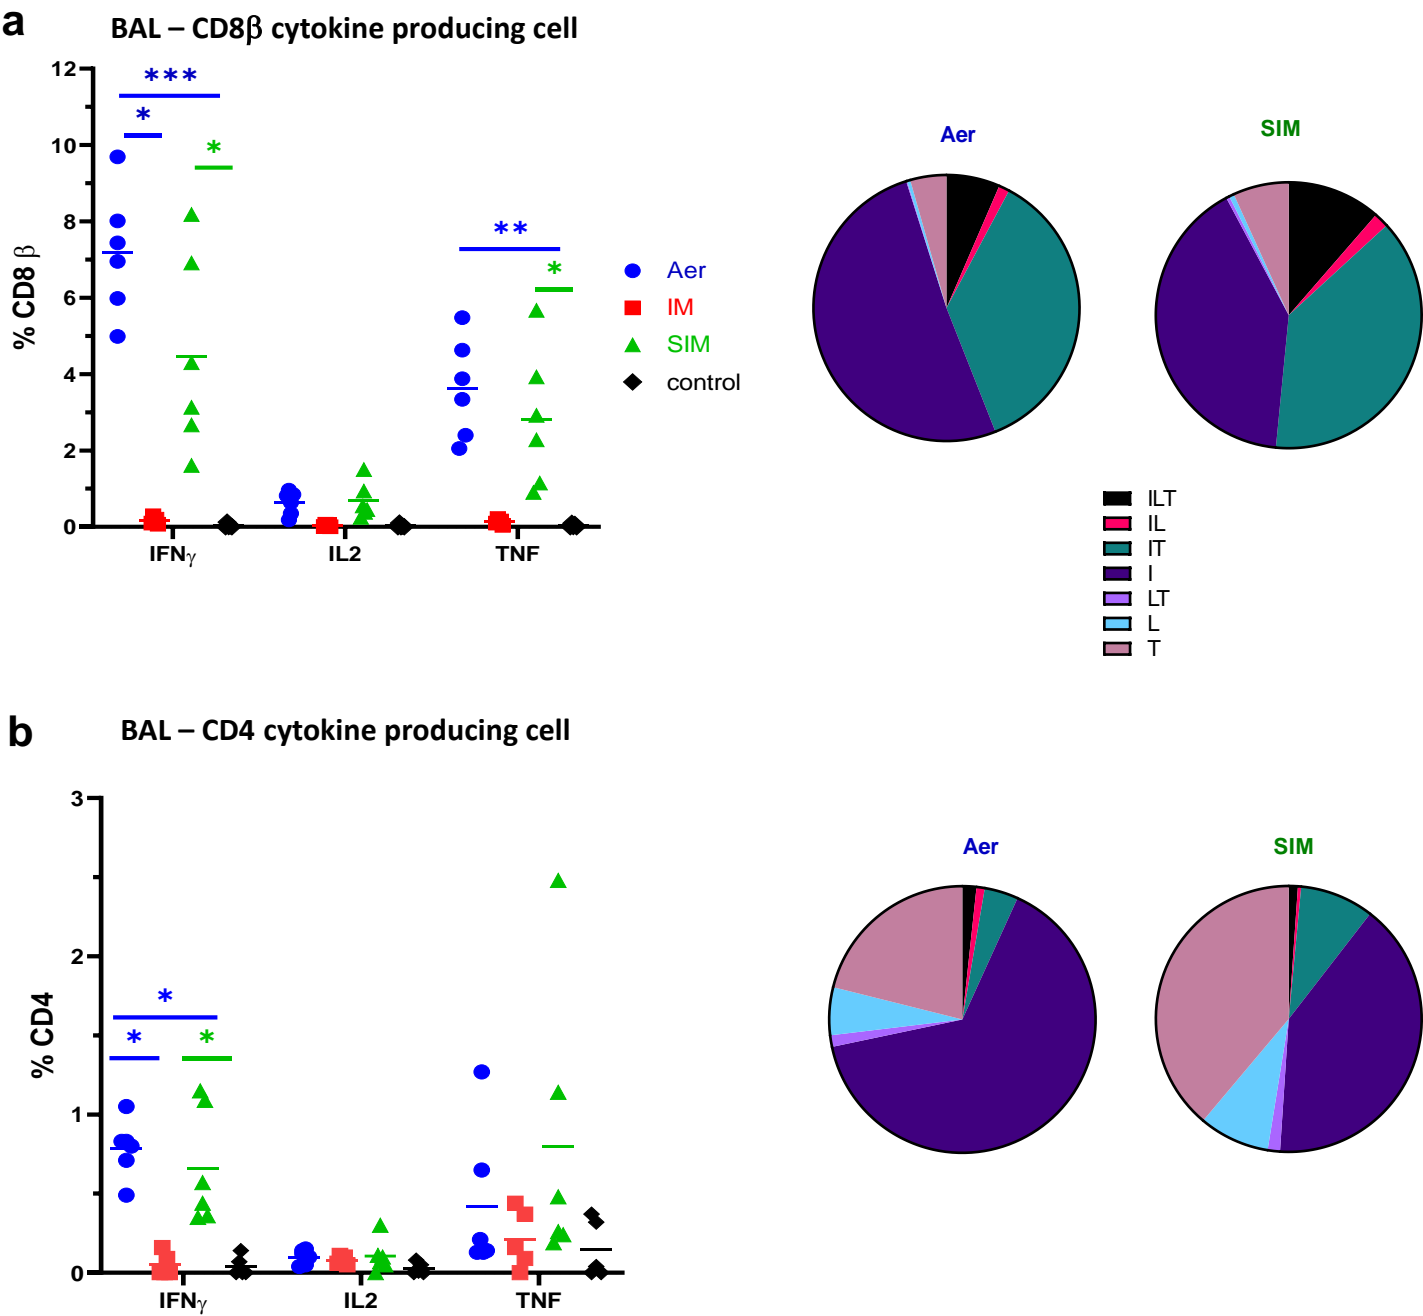

**Figure 4. Cytokine secretion in BAL.** BAL was collected at 4 DPC. Cryopreserved cells were thawed, stimulated with H1N1pdm09 and IFN $\gamma$ , IL-2 and TNF cytokine secretion measured in CD8 (a) and CD4 (b) cells by intracellular staining. Each symbol represent an individual animal and the mean is shown as a bar. The pie chart shows the mean proportion of single, double and triple cytokine secreting CD8 T cells for IFN $\gamma$  (I), TNF (T) and IL-2 (L). Kruskal-Wallis test was used to compare responses between groups and asterisks indicate significant differences (\* $p < 0.05$ , \*\* $p < 0.01$ , \*\*\*  $p < 0.001$ ).

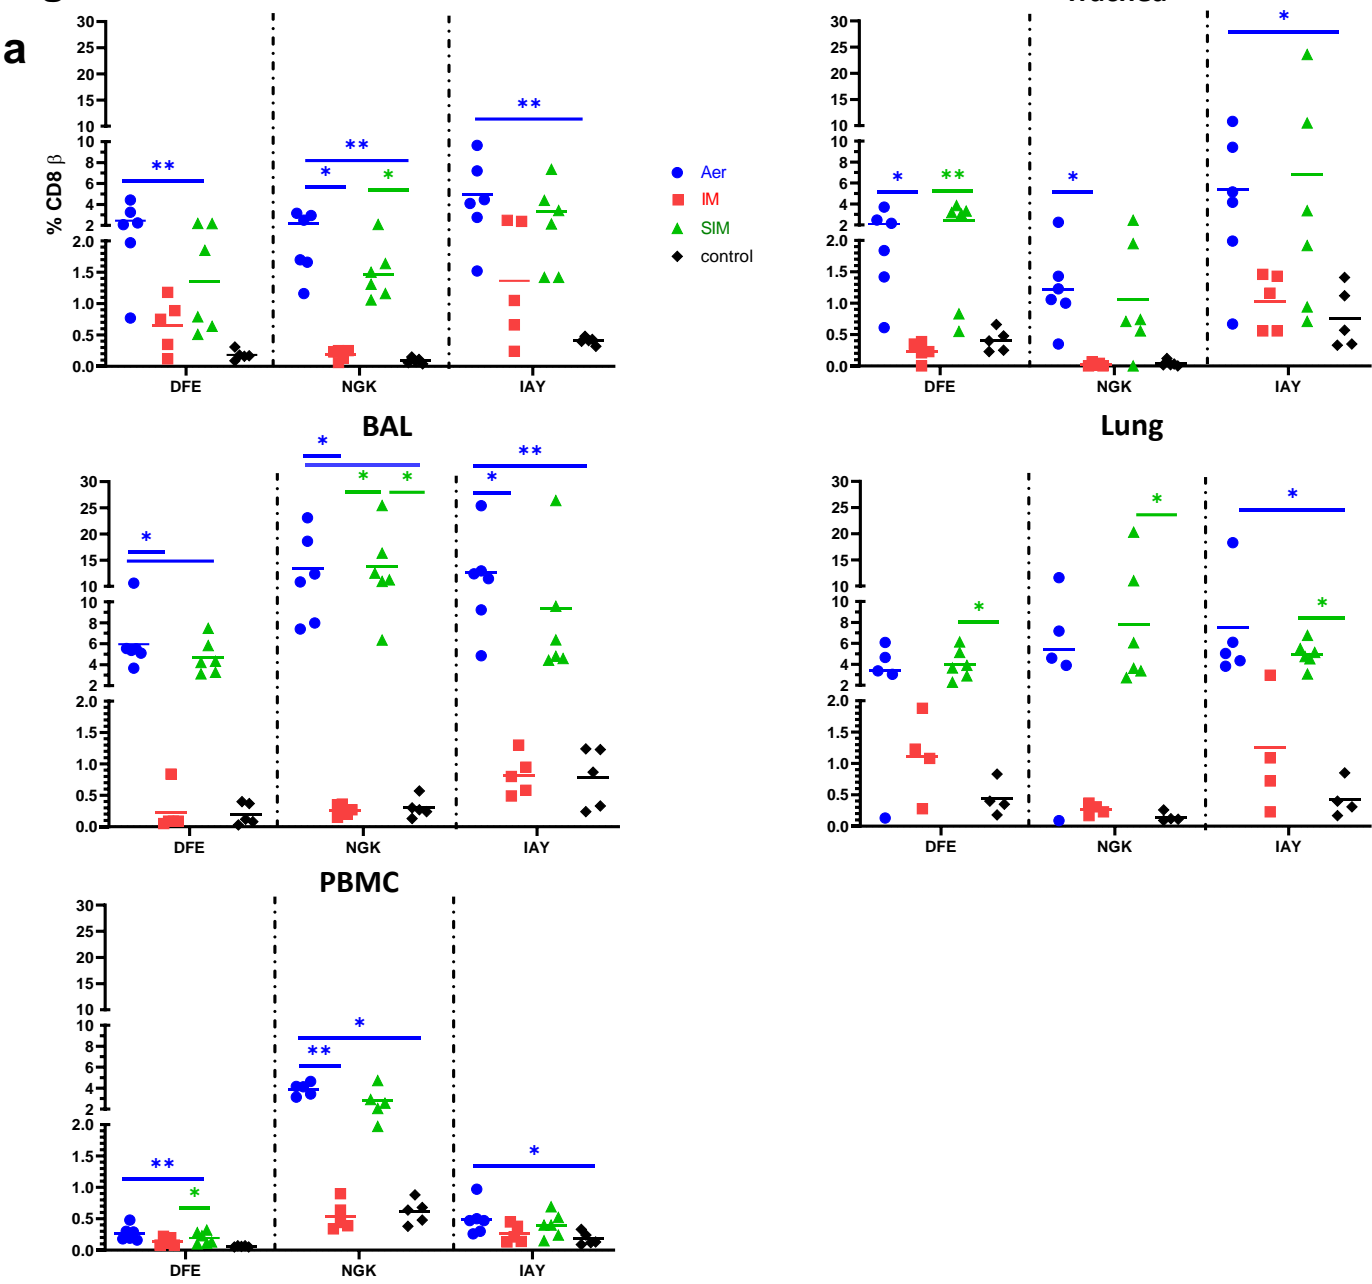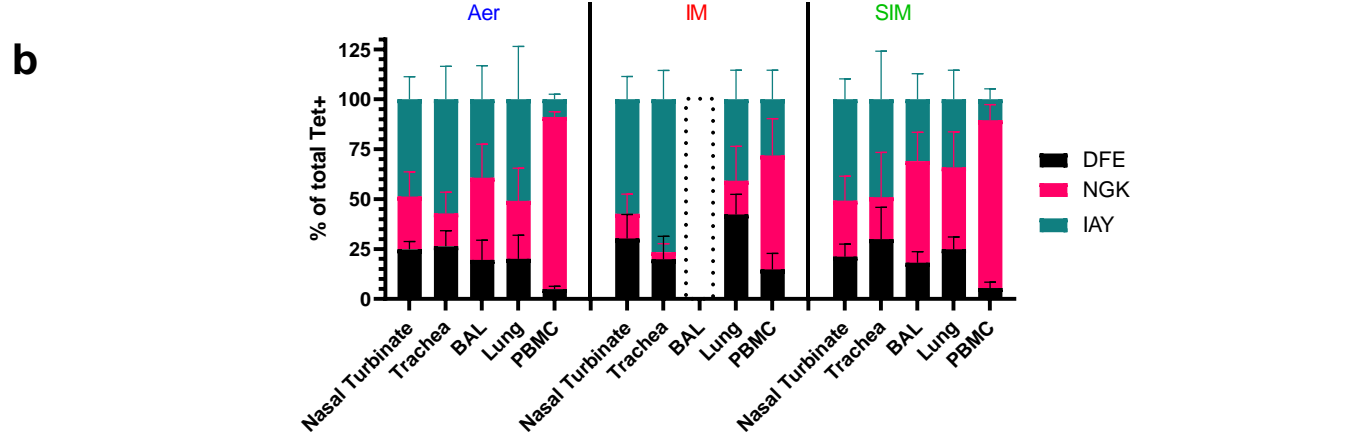

**Figure 5. NP specific tetramer responses in respiratory tissues and blood.** (a) Percentages of DFE, NGK and IAY tetramer + CD8 T cells in the respiratory tract and PBMC. Each symbol represent an individual animal and the mean is shown as a bar (b) Proportion of each tetramer among total tetramers+ CD8 T cells in different tissues. A dotted histogram for BAL of the IM group indicates the absence of response. The data represents the average of 2 separate assays. Kruskal-Wallis test was used to compare responses between groups (a) and two-way ANOVA to compare the proportions of tetramers in the different tissues of each group of animals (b). Asterisks denote significant differences (\* $p < 0.05$ , \*\* $p < 0.01$ , \*\*\*  $p < 0.001$ ).

## Figure 6

a

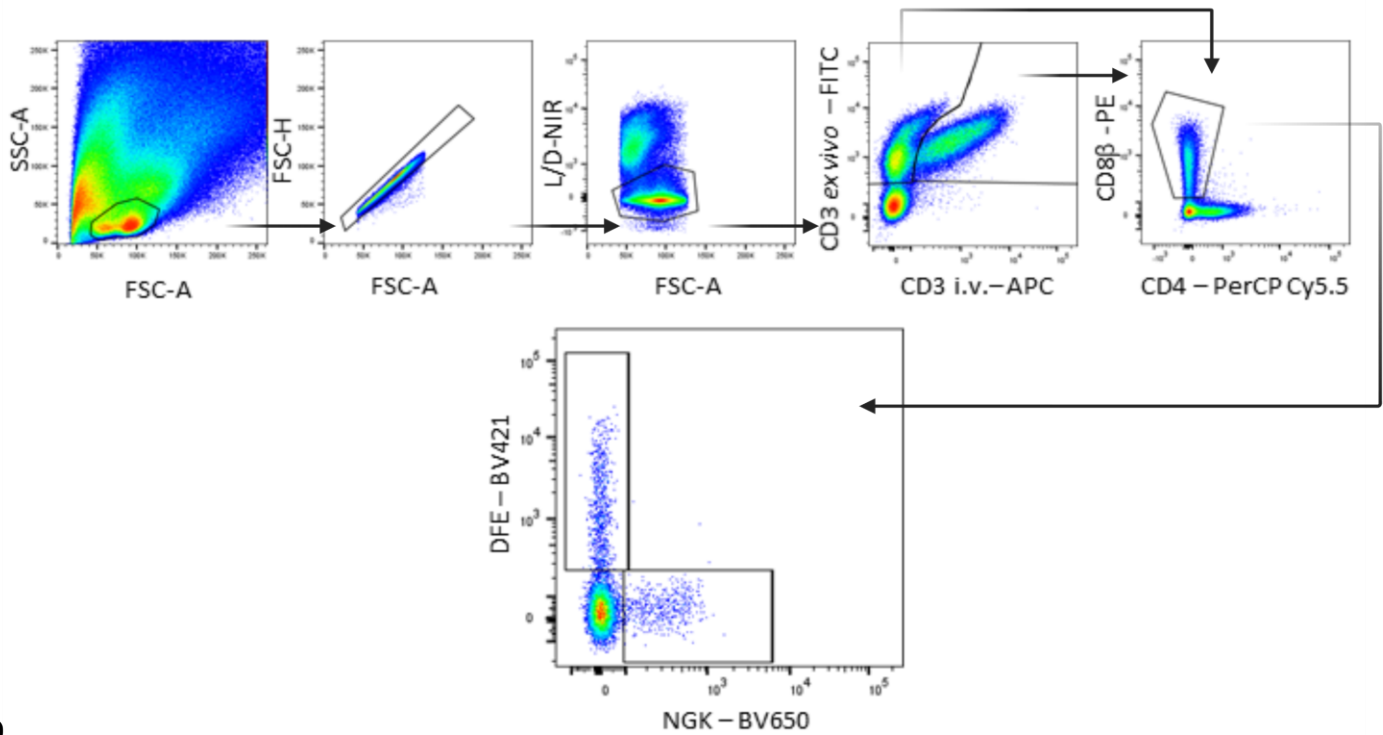

b

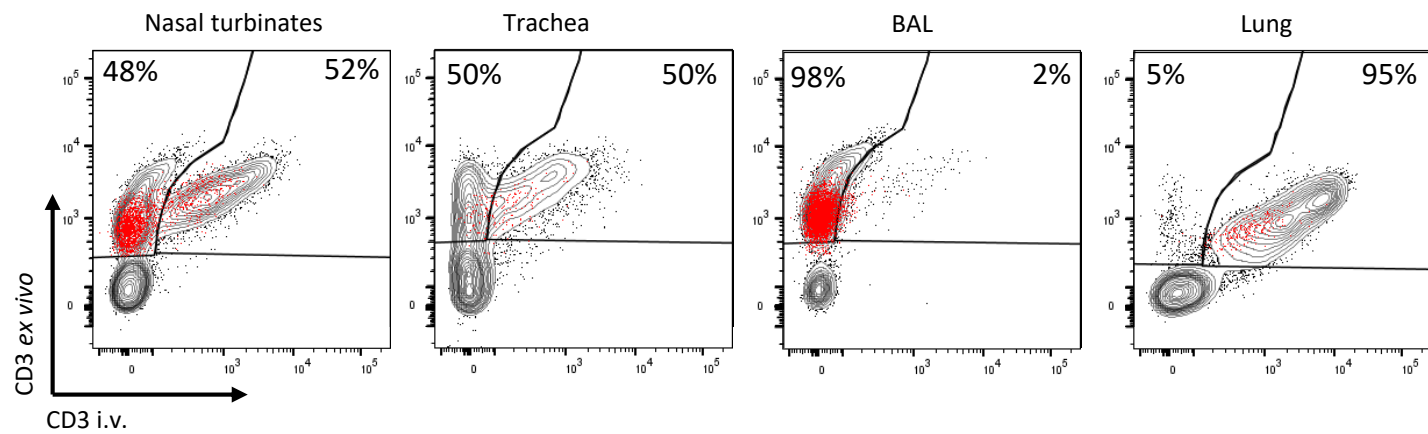

**Figure 6. Porcine tissue resident memory cells.** Three pigs from the vaccinated groups and two control pigs were infused intra-venously with CD3 mAb and culled 10 min later. **(a)** Representative FACS plots of cells isolated from nasal turbinates of the Aer group showing the gating strategy. **(b)** Lymphocytes were isolated and stained *ex vivo* with the same clone of CD3 Ab labelled with FITC (in grey) as described in the methods. As the infused CD3 does not saturate all CD3 sites some nasal turbinate, tracheal and lung tissue T cells are double positive (intravascular cells). A proportion of BAL, nasal turbinate and tracheal cells are unstained by intravascular mAb, indicating tissue residency. Tetramer positive T cells present after Aer immunization in the different tissues are shown in red.



**Table 1. List of antibodies used for intracellular cytokine staining and NP tetramers enumeration**

|                             | <b>Antibody</b>        | <b>Clone</b> | <b>Isotype</b> | <b>Fluorophore</b> | <b>Supplier</b> |
|-----------------------------|------------------------|--------------|----------------|--------------------|-----------------|
| <b>Tetramer enumeration</b> | Anti porcine CD3       | PPT3         | mouse IgG1     | FITC               | Biorad          |
|                             | Anti porcine CD4       | 74-12-4      | mouse IgG2b    | PerCP Cy5.5        | BD              |
|                             | Anti porcine CD8 beta  | PG164A       | mouse IgG1     | PE                 | Biorad          |
|                             | Anti mouse IgG1        | RMG1-1       | N/A            | APC                | Biolegend       |
| <b>ICS</b>                  | Anti porcine CD3       | PPT3         | mouse IgG1     | FITC               | Biorad          |
|                             | Anti porcine CD4       | 74-12-4      | mouse IgG2b    | PerCP Cy5.5        | BD              |
|                             | Anti porcine CD8 beta  | PG164A       | mouse IgG1     | PE                 | Biorad          |
|                             | Anti porcine IFN gamma | P2G10        | mouse IgG1     | AF647              | BD              |
|                             | Anti human TNF alpha   | Mab11        | mouse IgG1     | BV421              | Biolegend       |
|                             | Anti porcine IL2       | A150D3F1     | mouse IgG2a    | unconjugated       | Invitrogen      |
|                             | Anti mouse IgG2a       | RMG2a        | N/A            | PE Cy7             | Biolegend       |
| Anti mouse IgG1             | A85-1                  | N/A          | BV650          | BD                 |                 |
